# Supplementary material for: Is postoperative decrease of serum albumin an early predictor of complications after major abdominal surgery? A prospective cohort study in a European centre
Source: PubMed Central journal article supplement — BMJ Open. 2017 Apr 8;7(4):e013966. doi: 10.1136/bmjopen-2016-013966 (PMC5775466; doi:10.1136/bmjopen-2016-013966), 2017-04-08

**Supplementary Figure 1: Perioperative Kinetics of Serum Albumin (Alb)**

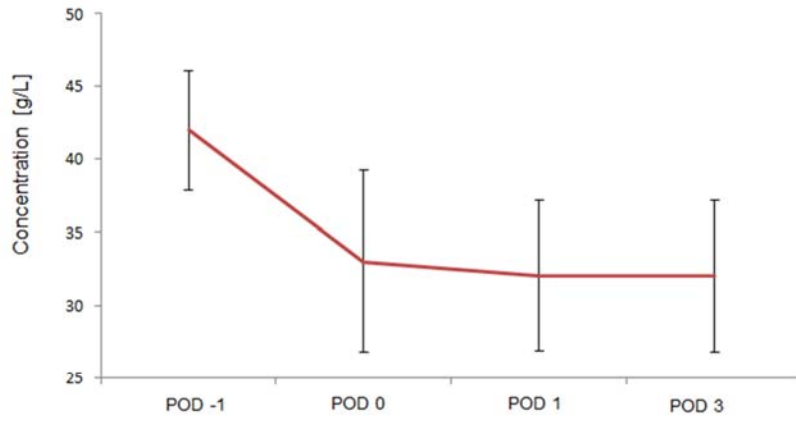

**Supplementary Figure 2: Receiver operating characteristic (ROC) curves of other stress markers**

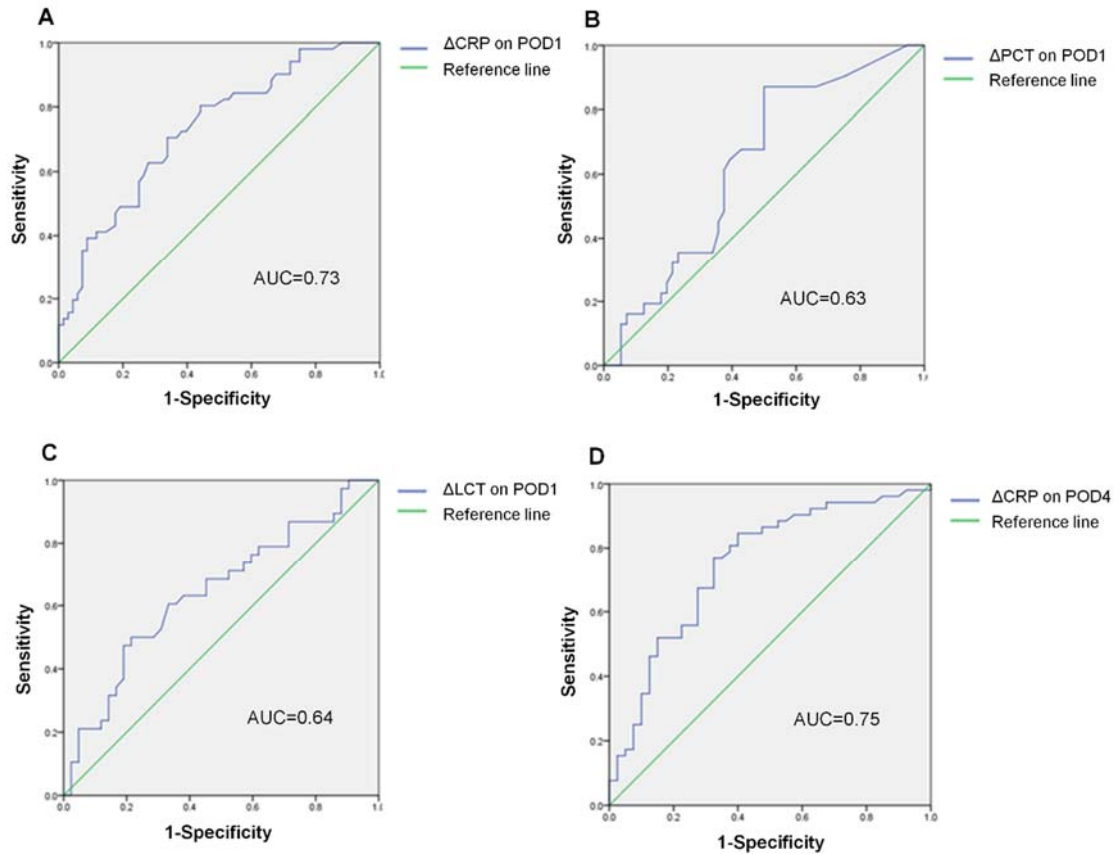

Supplement: bmjopen-2016-013966supp001.pdf [file bmjopen-2016-013966supp001.pdf]
