# Supplementary material for: Is postoperative decrease of serum albumin an early predictor of complications after major abdominal surgery? A prospective cohort study in a European centre
Source: PubMed Central journal article supplement — BMJ Open. 2017 Apr 8;7(4):e013966. doi: 10.1136/bmjopen-2016-013966 (PMC5775466; doi:10.1136/bmjopen-2016-013966), 2017-04-08
Supplement: bmjopen-2016-013966supp002.pdf [file bmjopen-2016-013966supp002.pdf]

**Supplementary Table 1: Correlations of the candidate biomarkers with outcomes.**

|            |         | mE-PASS |                  | Minor (I-II) |              | Major (III-V) |                  | Overall complication |                  | CCI     |                  | LoS     |                  |
|------------|---------|---------|------------------|--------------|--------------|---------------|------------------|----------------------|------------------|---------|------------------|---------|------------------|
|            |         | Pearson | p-value          | Spearman     | p-value      | Spearman      | p-value          | Spearman             | p-value          | Pearson | p-value          | Pearson | p-value          |
| <b>CRP</b> | Δ Max   | 0.062   | 0.530            | 0.256        | <b>0.003</b> | 0.387         | <b>&lt;0.001</b> | 0.534                | <b>&lt;0.001</b> | 0.529   | <b>&lt;0.001</b> | 0.484   | <b>&lt;0.001</b> |
|            | Δ POD 0 | 0.052   | 0.693            | 0.070        | 0.566        | 0.049         | 0.686            | 0.098                | 0.417            | 0.231   | 0.052            | 0.381   | <b>0.001</b>     |
|            | Δ POD 1 | 0.116   | 0.256            | 0.207        | <b>0.024</b> | 0.273         | <b>0.003</b>     | 0.395                | <b>&lt;0.001</b> | 0.469   | <b>&lt;0.001</b> | 0.462   | <b>&lt;0.001</b> |
| <b>Alb</b> | Δ Max   | 0.323   | <b>0.001</b>     | 0.264        | <b>0.003</b> | 0.345         | <b>&lt;0.001</b> | 0.470                | <b>&lt;0.001</b> | 0.373   | <b>&lt;0.001</b> | 0.358   | <b>&lt;0.001</b> |
|            | Δ POD 0 | 0.479   | <b>&lt;0.001</b> | 0.298        | <b>0.006</b> | 0.194         | 0.077            | 0.420                | <b>&lt;0.001</b> | 0.302   | <b>0.005</b>     | 0.259   | <b>0.018</b>     |
|            | Δ POD 1 | 0.275   | <b>0.010</b>     | 0.228        | <b>0.016</b> | 0.372         | <b>&lt;0.001</b> | 0.485                | <b>&lt;0.001</b> | 0.383   | <b>&lt;0.001</b> | 0.468   | <b>&lt;0.001</b> |
| <b>PCT</b> | Δ Max   | -0.050  | 0.656            | 0.240        | <b>0.016</b> | 0.181         | 0.071            | 0.339                | <b>0.001</b>     | 0.140   | 0.162            | 0.204   | <b>0.040</b>     |
|            | Δ POD 0 | 0.017   | 0.906            | 0.171        | 0.204        | 0.076         | 0.570            | 0.211                | 0.112            | 0.015   | 0.909            | 0.168   | 0.206            |
|            | Δ POD 1 | -0.010  | 0.933            | 0.135        | 0.216        | 0.150         | 0.165            | 0.220                | <b>0.041</b>     | -0.034  | 0.752            | 0.103   | 0.342            |
| <b>LCT</b> | Δ Max   | 0.269   | <b>0.013</b>     | 0.301        | <b>0.003</b> | 0.196         | 0.057            | 0.426                | <b>&lt;0.001</b> | 0.317   | <b>0.002</b>     | 0.327   | <b>0.001</b>     |
|            | Δ POD 0 | 0.244   | <b>0.039</b>     | 0.297        | <b>0.007</b> | 0.178         | 0.111            | 0.412                | <b>&lt;0.001</b> | 0.299   | <b>0.007</b>     | 0.292   | <b>0.008</b>     |
|            | Δ POD 1 | 0.118   | 0.331            | 0.265        | <b>0.018</b> | 0.026         | 0.817            | 0.248                | <b>0.026</b>     | 0.193   | 0.087            | 0.104   | 0.360            |

Complications are graded according to the Clavien classification (grade I to V); mE-PASS: Modified Estimation of Physiologic Ability and Surgical Stress; CCI: Comprehensive complication index; LoS: Length of stay; CRP: C-reactive protein; Alb: Serum albumin; PCT: Procalcitonin; LCT: Lactates; Δ Max: Maximal difference between the pre- and post-operative values; Δ POD 0: Difference of concentration on POD -1 and POD 0; Δ Pod 1: Difference of concentration on POD -1 and POD 1
