# Supplementary material for: Is postoperative decrease of serum albumin an early predictor of complications after major abdominal surgery? A prospective cohort study in a European centre
Source: PubMed Central journal article supplement — BMJ Open. 2017 Apr 8;7(4):e013966. doi: 10.1136/bmjopen-2016-013966 (PMC5775466; doi:10.1136/bmjopen-2016-013966), 2017-04-08
Supplement: bmjopen-2016-013966supp003.pdf [file bmjopen-2016-013966supp003.pdf]

**Supplementary Table 2: Discriminatory ability of albumin decrease on POD1**

|                      | $\Delta$ Alb POD1 |               | p-value          |
|----------------------|-------------------|---------------|------------------|
|                      | <10 g/L           | $\geq$ 10 g/L |                  |
|                      | n (%)             | n (%)         |                  |
| <b>Complications</b> |                   |               |                  |
| Minor (I-II)         | 8 (15)            | 21 (36)       | <b>0.011</b>     |
| Major (III-V)        | 3 (6)             | 16 (28)       | <b>0.002</b>     |
| Overall              | 11 (20)           | 37 (64)       | <b>&lt;0.001</b> |
| CCI                  | 0                 | 20.9 (0-33.5) | <b>&lt;0.001</b> |
| <b>LoS</b>           | 4 (4-7)           | 13 (13-21)    | <b>&lt;0.001</b> |

Complications are graded according to the Clavien classification (grade I to V);  $\Delta$ Alb POD1: The difference between serum albumin concentration on POD -1 and POD 1 (g/L); mE-PASS: Modified Estimation of Physiologic Ability and Surgical Stress; CCI: Comprehensive complication index; LoS: Length of stay
